# Supplementary material for: Utilizing solid polyamines in a rotary bed to capture CO2 in an energy and cost-efficient manner
Source: Royal Society of Chemistry journal article supplement (doi:10.1039/d3re00089c), 2023-01-01
Supplement: d3re00089c1.pdf [file d3re00089c1.pdf]

1 **Supplementary Information**

2

3 **Utilizing solid polyamine in a rotary bed to capture CO<sub>2</sub> in an**  
4 **energy and cost-efficient manner**

5

6 *Jubao Gao<sup>a</sup>; Jun Yan<sup>a</sup>; Xueyi Song<sup>a</sup>; Youkun Gao<sup>b</sup>; Gaofeng Deng<sup>c,d</sup>; Zhichao Wang<sup>c,d</sup>\*; Lingdi Cao<sup>e</sup>\**

7 <sup>a</sup>School of Energy and Environmental Engineering, University of Science and Technology Beijing,

8 Beijing, 100083, China,

9 <sup>b</sup>Key Laboratory of Power Station Energy Transfer Conversion and System, Ministry of Education,

10 School of Energy, Power and Mechanical Engineering, North China Electric Power University, Beijing

11 102206, China,

12 <sup>c</sup>State Key Laboratory of Building Safety and Built Environment, Beijing, 100013, China,

13 <sup>d</sup>China Academy of Building Research, Beijing, 100013, China,

14 <sup>e</sup>18<sup>th</sup> Research Institute, China Electronics Technology Group Corporation, Tianjin 300384, China.

15 Corresponding author: \* Email: wangzcc@emcso.com; lingdicao@163.com

16

17

18

19

20

21

22

23

24

25

26

27

28

29

30

**Table S1** Constants for gas properties.

| Gas components  | Constants      | Equation $C_{P,i}$       | Equation $K_i$          | Equation $\mu_i$        |
|-----------------|----------------|--------------------------|-------------------------|-------------------------|
| CO <sub>2</sub> | C <sub>1</sub> | 1194.11                  | 0                       | 0                       |
|                 | C <sub>2</sub> | 1.8865                   | $7.5 \times 10^{-5}$    | $0.0624 \times 10^{-6}$ |
|                 | C <sub>3</sub> | $-0.636 \times 10^{-3}$  | 0                       | $5.0 \times 10^{-11}$   |
|                 | C <sub>4</sub> | 0                        | 0                       | $4.0 \times 10^{-14}$   |
| N <sub>2</sub>  | C <sub>1</sub> | 1206.07                  | $1.6452 \times 10^{-3}$ | $2.306 \times 10^{-6}$  |
|                 | C <sub>2</sub> | 0.2595                   | $0.8726 \times 10^{-4}$ | $0.0603 \times 10^{-6}$ |
|                 | C <sub>3</sub> | $-0.0129 \times 10^{-3}$ | $-0.3 \times 10^{-7}$   | $3.0 \times 10^{-11}$   |
|                 | C <sub>4</sub> | 0                        | 0                       | $8.0 \times 10^{-14}$   |

31

32

33

**Table S2** Constants for equation 9.

| Constants        | C <sub>1</sub> | C <sub>2</sub> | C <sub>3</sub> | C <sub>4</sub> | C <sub>5</sub> | C <sub>6</sub> |
|------------------|----------------|----------------|----------------|----------------|----------------|----------------|
| H <sub>2</sub> O | 68.5549        | -7004.80       | 0.0035888      | -6.6689        | $-8.505e-7$    | 2              |

34

35

36

**Table S3** Boundary and initial conditions.

| Section    | Bottom                        |                                 | Top                           |                                 |
|------------|-------------------------------|---------------------------------|-------------------------------|---------------------------------|
| Adsorption | T = 303K                      | $C_i = C_{\text{feed},i}$       | $\partial T / \partial z = 0$ | $\partial C_i / \partial z = 0$ |
| Vacuum     | $\partial T / \partial z = 0$ | $\partial C_i / \partial z = 0$ | T = 348K                      | $C_i = C_{\text{vout},i}$       |
| Purge      | T = T <sub>aout</sub>         | $C_i = C_{\text{aout},i}$       | $\partial T / \partial z = 0$ | $\partial C_i / \partial z = 0$ |

37 Where T<sub>aout</sub> denotes the average temperature at outlet of adsorption section or column. C<sub>feed,i</sub>38 is the concentration of gas component i at inlet of adsorption section or column. C<sub>vout,i</sub> and39 C<sub>aout,i</sub> refer to the average concentration of gas component i at outlet of vacuum and

40 adsorption section or column, respectively.

41

42 **Table S4** Calculation of Total CO<sub>2</sub> Capture Cost (TCC)

| Item       | Measures                                                                               |
|------------|----------------------------------------------------------------------------------------|
| <b>TCC</b> | Annual capital cost (ACC) + Annual operating cost (AOC)                                |
| <b>ACC</b> | Total capital investment (TCI) with a coefficient                                      |
| <b>TCI</b> | Fixed capital investment (FCI) + working capital + startup cost + initial solvent cost |
| <b>FCI</b> | Direct cost (DC) + Indirect cost (IC)                                                  |
| <b>AOC</b> | Variable operating cost (VOC) + Fixed operating cost (FOC)                             |

43

44 **Table S5** Total Capital Investment (TCI).

| Item                           | Values                                        |
|--------------------------------|-----------------------------------------------|
| <b>Direct Cost (DC)</b>        |                                               |
| Equipments installation        | 5% of EC                                      |
| Instrumentation and Control    | 10% of EC                                     |
| Piping                         | 10% of EC                                     |
| Building and building services | 5% of EC                                      |
| Yard improvements              | 5% of EC                                      |
| Land and Miscellaneous         | 5% of EC                                      |
| <b>Indirect Cost (IC)</b>      |                                               |
| Procurement cost               | 2% of DC                                      |
| Contingency                    | 10% of DC                                     |
| Engineering and Supervision    | 15% of DC                                     |
| <b>Startup cost</b>            | 1% of FCI                                     |
| <b>Working capital</b>         | 15% of FCI                                    |
| <b>Initial solvent cost</b>    | Original materials cost<br>with a coefficient |

45

46

**Table S6** Annual Operating Cost (AOC).

| Item                                  | Values                       |
|---------------------------------------|------------------------------|
| <b>Variable Operating Costs (VOC)</b> |                              |
| Electrical cost of blower and pump    | 0.07 US\$/kWh                |
| Adsorbents make-up                    | 10% of total adsorbent costs |
| <b>Fixed Operating Costs (FOC)</b>    |                              |
| Maintenance (M)                       | 3% of FCI                    |
| Insurance                             | 1% of FCI                    |
| Local tax                             | 1% of FCI                    |
| Operating supplies                    | 15% of M                     |
| Operating labor (OL)                  | 34.5 US\$/h                  |
| Operating hours                       | 7000 h/a                     |

47

48

**Table S7** Comparison of energy and cost of different processes

| Materials                 | TCC (\$/t) | TCI (\$/t) | FOC (\$/t) | VOC (\$/t) | Energy Consumption (GJ/t) | Reference |
|---------------------------|------------|------------|------------|------------|---------------------------|-----------|
| MEA                       | 70         | 14         | 13         | 43         | 3.72                      | [32]      |
| [Bpy]BF <sub>4</sub> -MEA | 60         | 14         | 12         | 34         | 2.51                      | [32]      |
| Polyamine-fixed bed       | 41.64      | 17.03      | 12.45      | 12.17      | 1.28                      | This work |
| Polyamine-rotating column | 32.6       | 13.3       | 11.49      | 7.77       | 1.11                      | This work |

49

50

51
